# Supplementary material for: A Clinical Outcome of the Anti-PD-1 Therapy of Melanoma in Polish Patients Is Mediated by Population-Specific Gut Microbiome Composition
Source: Cancers (Basel). 2022 Oct 31;14(21):5369. doi: 10.3390/cancers14215369 (PMC9653730; doi:10.3390/cancers14215369)
Supplement: Supplementary file 1 [file cancers-14-05369-s001.zip]

Archive with 4 entries (4 files):
- Document S1.pdf
- Figure S1_Clustering_dendrogram.pdf
- Table S1.xlsx
- Table S2.xlsx
