# Supplementary figures and images for: A Clinical Outcome of the Anti-PD-1 Therapy of Melanoma in Polish Patients Is Mediated by Population-Specific Gut Microbiome Composition
Source: MDPI journal article supplement (doi:10.3390/cancers14215369), 2022-10-31

MASH clustering

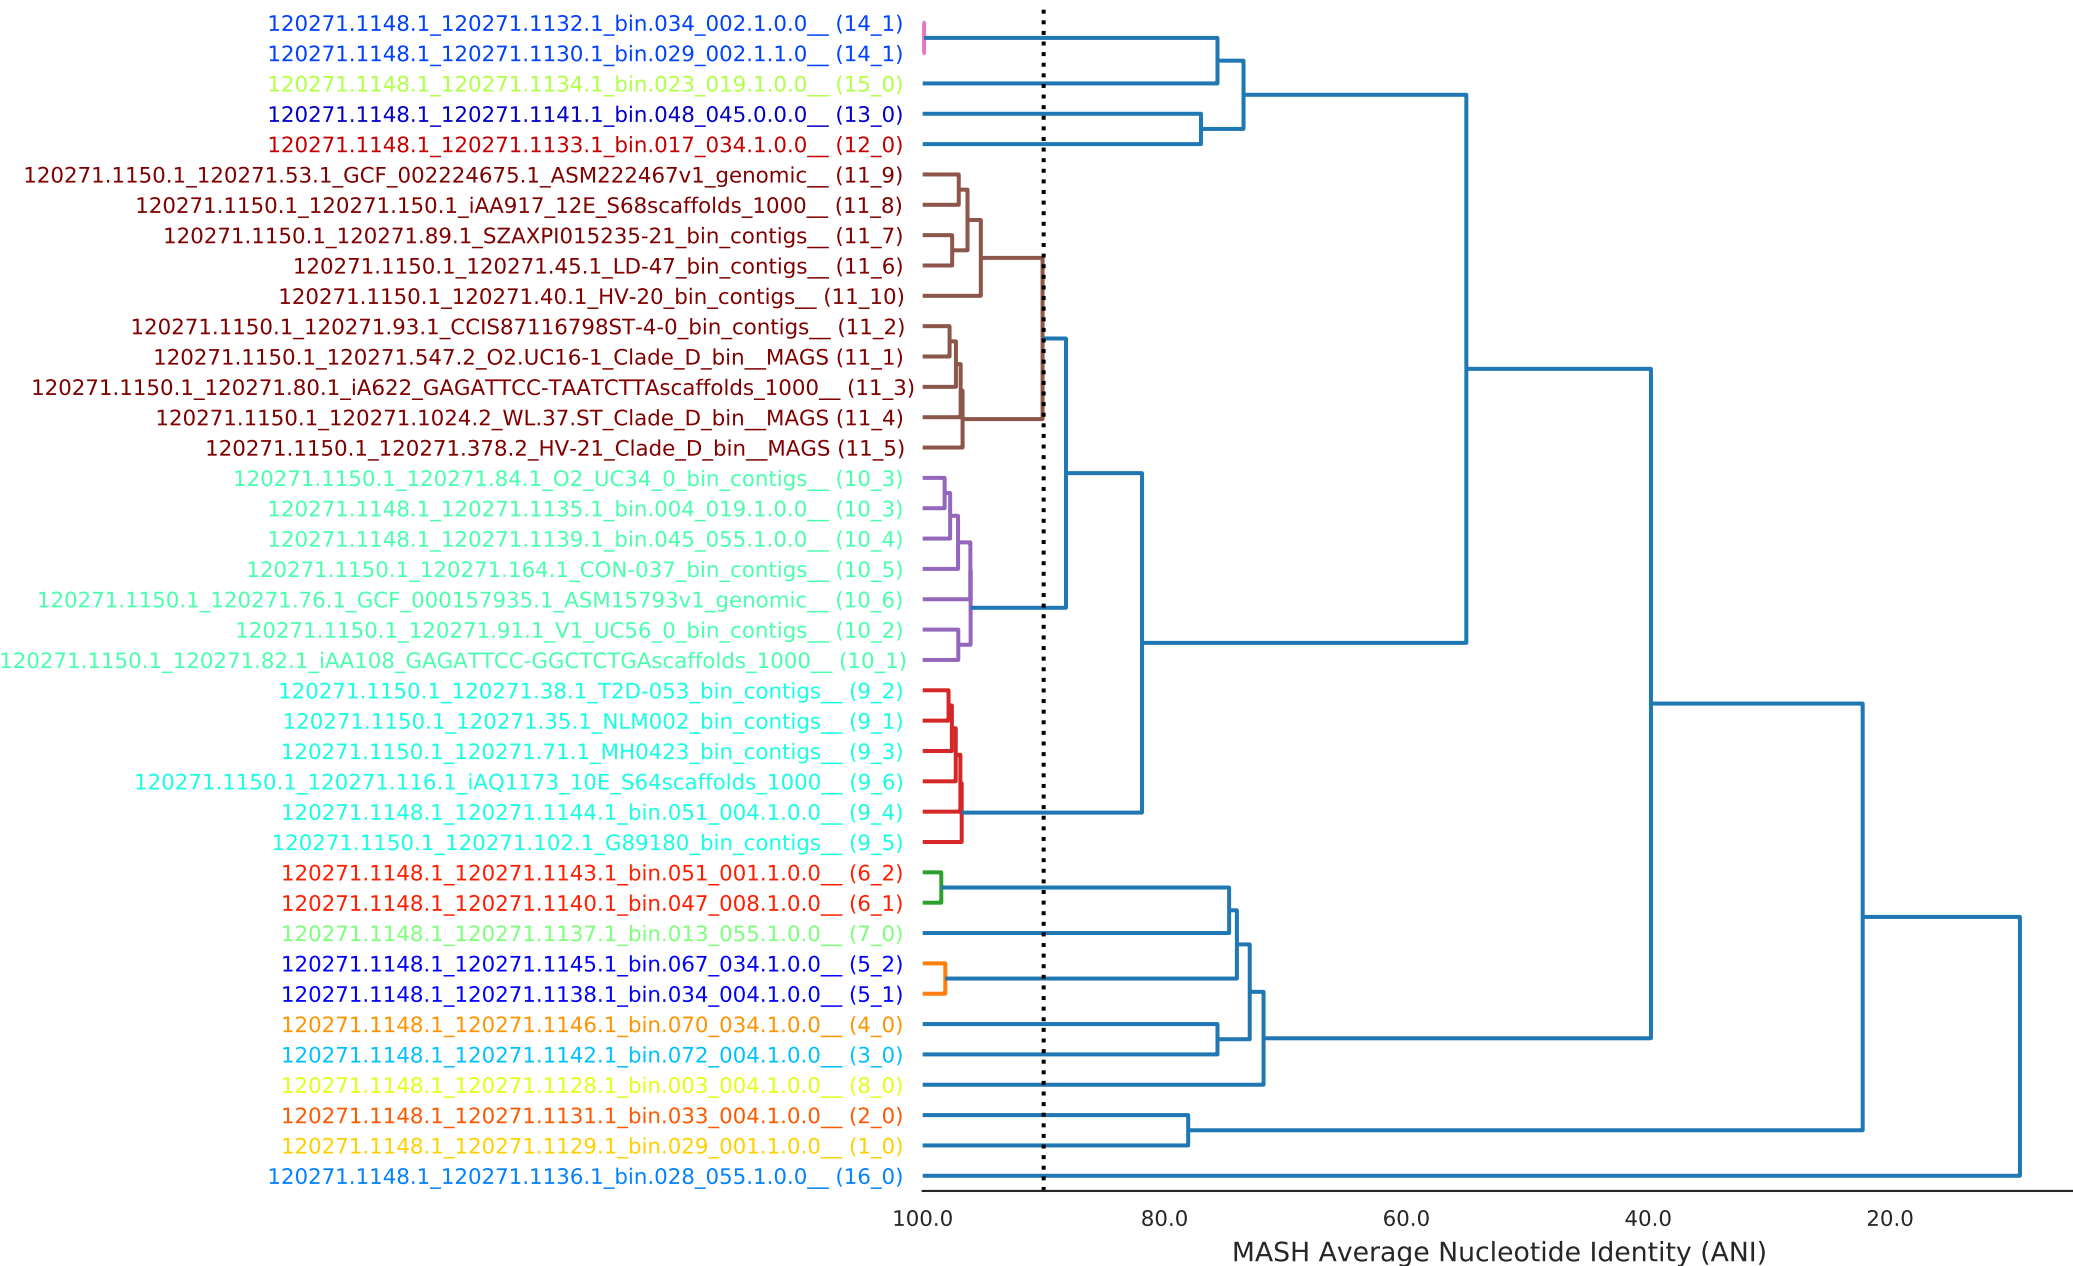

Supplement: s1 [file s1]
